# Supplementary material for: Cytotoxicity, Oxidative Stress, Cell Cycle Arrest, and Mitochondrial Apoptosis after Combined Treatment of Hepatocarcinoma Cells with Maleic Anhydride Derivatives and Quercetin
Source: Hindawi journal article supplement (doi:10.1155/2017/2734976), 2017-01-01

Supplementary 1

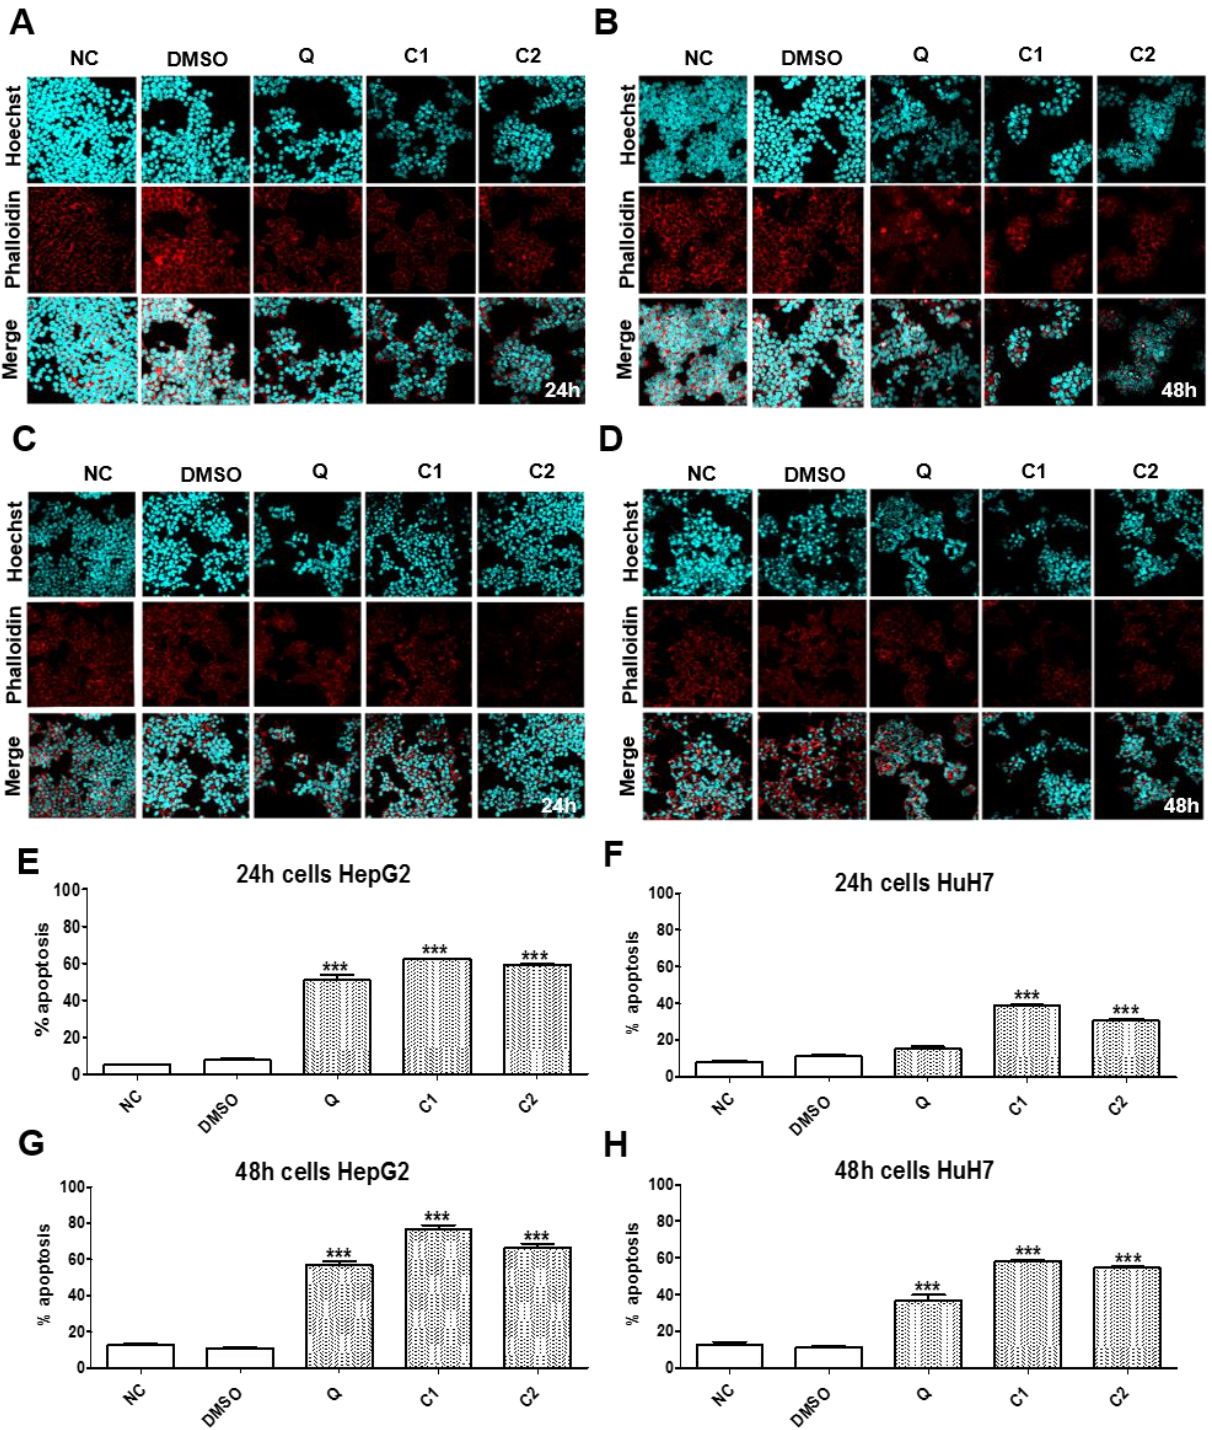

## Supplementary 2

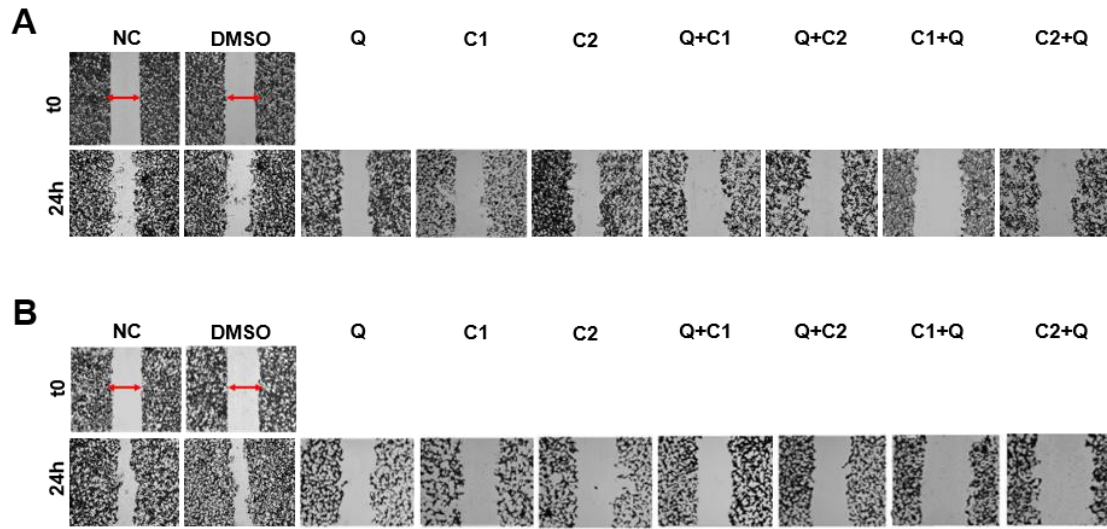

Supplement: f1 [file 2734976.f1.pdf]
